1 **TITLE: Predicting *Vibrio cholerae* infection and disease severity using metagenomics in a**  
2 **prospective cohort study**

3  
4 **AUTHORS:** Inès Levade<sup>1</sup>, Morteza M. Saber<sup>1</sup>, Firas Midani<sup>2,3,4</sup>, Fahima Chowdhury<sup>5</sup>, Ashraful  
5 I. Khan<sup>5</sup>, Yasmin A. Begum<sup>5</sup>, Edward T. Ryan<sup>6,7,9</sup>, Lawrence David<sup>2,3,4,8</sup>, Stephen B.  
6 Calderwood<sup>6,7,10</sup>, Jason B. Harris<sup>6,11</sup>, Regina C. LaRocque<sup>6</sup>, Firdausi Qadri<sup>5</sup>, B. Jesse Shapiro<sup>1\*</sup>,  
7 Ana A. Weil<sup>12</sup>

8  
9 <sup>1</sup>Department of Biological Sciences, University of Montreal, Montreal, Quebec, Canada.

10 <sup>2</sup>Program in Computational Biology and Bioinformatics, Duke University, Durham, NC, USA

11 <sup>3</sup>Center for Genomic and Computational Biology, Duke University, Durham, NC, USA

12 <sup>4</sup>Department of Molecular Genetics and Microbiology, Duke University, Durham, NC, USA

13 <sup>5</sup>Center for Vaccine Sciences, International Centre for Diarrhoeal Disease Research, Dhaka,  
14 Bangladesh

15 <sup>6</sup>Division of Infectious Diseases, Massachusetts General Hospital, Boston, MA, USA

16 <sup>7</sup>Department of Medicine, Harvard Medical School, Boston, MA USA

17 <sup>8</sup>Department of Biomedical Engineering, Duke University, Durham, NC, USA

18 <sup>9</sup>Department of Immunology and Infectious Diseases, Harvard T.H. Chan School of Public  
19 Health, Boston, MA, USA

20 <sup>10</sup>Department of Microbiology, Harvard Medical School, Boston, MA USA

21 <sup>11</sup>Department of Pediatrics, Harvard Medical School, Boston, MA, USA

22 <sup>12</sup>Division of Allergy and Infectious Diseases, University of Washington, WA, USA

23

24 **CORRESPONDING AUTHOR** : [jesse.shapiro@umontreal.ca](mailto:jesse.shapiro@umontreal.ca)

25

26 **RUNNING TITLE**: Stool metagenomics predicts cholera

27 **ABSTRACT (word count: 196)**  
28

29 **Background:** Susceptibility to *Vibrio cholerae* infection is impacted by blood group, age, and  
30 pre-existing immunity, but these factors only partially explain who becomes infected. A recent  
31 study used 16S rRNA amplicon sequencing to quantify the composition of the gut microbiome  
32 and identify predictive biomarkers of infection with limited taxonomic resolution.

33 **Methods:** To achieve increased resolution of gut microbial factors associated with *V. cholerae*  
34 susceptibility and identify predictors of symptomatic disease, we applied deep shotgun  
35 metagenomic sequencing to a cohort of household contacts of patients with cholera.

36 **Results:** Using machine learning, we resolved species, strains, gene families, and cellular  
37 pathways in the microbiome at the time of exposure to *V. cholerae* to identify markers that  
38 predict infection and symptoms. Use of metagenomic features improved the precision and  
39 accuracy of prediction relative to 16S sequencing. We also predicted disease severity, although  
40 with greater uncertainty than our infection prediction. Species within the genera *Prevotella* and  
41 *Bifidobacterium* predicted protection from infection, and genes involved in iron metabolism also  
42 correlated with protection.

43 **Conclusion:** Our results highlight the power of metagenomics to predict disease outcomes and  
44 suggest specific species and genes for experimental testing to investigate mechanisms of  
45 microbiome-related protection from cholera.

46

47 **KEYWORDS:** *Vibrio cholerae*, cholera, microbiome, machine learning, metagenomics  
48  
49

50 **MAIN TEXT (word count: 3407)**

51

## 52 INTRODUCTION

53

54 Cholera is an acute diarrheal disease caused by *Vibrio cholerae*. Cholera is a major public  
55 health threat worldwide that continues to cause major outbreaks, such as in Yemen, where over  
56 1.7 million cases have been reported since 2016 (1,2). Transmission of *V. cholerae* between  
57 household members commonly occurs through shared sources of contaminated food or water or  
58 through fecal-oral spread (3,4). The clinical spectrum of disease ranges from asymptomatic  
59 infection to severe watery diarrhea that can lead to fatal dehydration (5). Host factors such as age,  
60 innate immune factors, blood group, or prior acquired immunity partially explain why some  
61 people are more susceptible to *V. cholerae* infection than others, but a substantial amount of the  
62 variation remains unexplained (6).

63 The composition of the gut bacterial community can protect against enteropathogenic  
64 infections (7), and may explain some of the variation in *V. cholerae* susceptibility. Several studies  
65 have identified commensal bacteria and mechanisms that could be protective against *V. cholerae*.  
66 For instance, a species enriched in the gut microbiota of patients recovering from cholera, *Blautia*  
67 *obeum*, was found to interfere with *V. cholerae* pathogenicity through quorum-sensing inhibition  
68 in a mouse model (8). Animal and *in vitro* experiments have demonstrated that alteration of  
69 commensal-derived metabolite levels influenced host susceptibility by affecting *V. cholerae*  
70 growth or colonization (9-13).

71 Studies of *V. cholerae* and the gut microbiota often focus on a limited number of bacterial  
72 species or involve patients who already have symptomatic cholera (8,14). One study to date has  
73 characterized the gut microbiome of individuals exposed to *V. cholerae* to predict susceptibility  
74 to infection (15). In this study, Midani *et al.* developed a machine learning model to predict  
75 susceptibility based on 16S rRNA gene amplicon sequencing of the gut microbiota in a group of

76 household contacts of patients who have cholera, a group known to have high risk of infection  
77 (4). Midani *et al* showed that the microbiome composition at the time of exposure to *V. cholerae*  
78 can predict infection with similar or better accuracy as the commonly measured host factors  
79 known to impact susceptibility. However, 16S rRNA sequencing does not allow identification of  
80 precise strains or the underlying genetic factors of the observed relationship.

81 To increase our understanding of the relationship between the gut microbiome and  
82 susceptibility to *V. cholerae*, we used shotgun metagenomics to analyze an expanded prospective  
83 cohort of persons exposed to *V. cholerae* in Bangladesh. We sequenced all DNA obtained from  
84 study participant rectal swabs (rather than only the 16S rRNA gene), and this resulted in  
85 improved predictive power, including identification of specific genes associated with remaining  
86 uninfected after exposure to *V. cholerae*. We also examined a larger cohort of samples to predict  
87 disease severity among infected contacts, albeit with lower power and precision than our  
88 susceptibility prediction. We also highlight several microbiome metabolic functions associated  
89 with protection against cholera.

## 90 **METHODS**

### 91 **Sample collection, clinical outcomes and metagenomic sequencing**

92 As described in (15), household contacts were enrolled within 6 hours of the presentation  
93 of an index cholera case at the icddr,b (International Center for Diarrheal Disease Research,  
94 Bangladesh) Dhaka Hospital. Index patients with severe acute diarrhea, a stool culture positive  
95 for *V. cholerae*, age between 2 and 60 years old, and no major comorbid conditions were  
96 recruited (4,6). A clinical assessment of symptoms in household contacts was conducted daily for  
97 the 10-day period after presentation of the index case, and repeated on day 30. We collected  
98 demographic information, rectal swabs, and blood samples for ABO typing and vibriocidal  
99 antibody titers as described in the Supplementary Methods. During the observation period,  
100 contacts were determined to be infected if any rectal swab culture was positive for *V. cholerae*  
101 and/or if the contact developed diarrhea and a 4-fold increase in vibriocidal titer during the  
102 follow-up period (4,6). Contacts with positive rectal swabs developing watery diarrhea were  
103 categorized as symptomatic and those without diarrhea were considered asymptomatic (**Figure**  
104 **1**). *V. cholerae* positive contacts (by culture or 16S testing) at the time of enrollment were  
105 excluded, in addition to contacts who reported antibiotic use or diarrhea during the week prior to  
106 enrollment. DNA extraction was performed for the selected samples and used for shotgun  
107 metagenomics sequencing. Detailed information on cohorts, sequencing methods and sample  
108 processing are described in Supplemental Methods.

109

### 110 **Taxonomic/functional profiling and predictive model construction**

111 We used MetaPhlan2 (version 2.9) (16) for taxonomic profiling and HUMAnN2 (17) was  
112 used to profile cellular pathways (from MetaCyc) and gene families (identified using the PFAM  
113 database of protein families). See the Supplementary Methods for further details on the

114 bioinformatic analyses. For identification of metagenomic biomarkers of susceptibility and  
115 disease severity, we used MetAML (18), a computational tool for metagenomics-based prediction  
116 tasks and for quantitative assessment of the strength of potential microbiome-phenotype  
117 associations. We applied a random forests (RF) classifier on species, pathways and gene-family  
118 relative abundances, as well as strain-specific markers presence/absence. Models constructed  
119 using each of these different types of features were compared to each other, to a random dataset  
120 with shuffled labels, and to a model constructed with clinical/demographic data, using two-  
121 sample, two-sided *t*-tests over 20 replicate cross-validation, as previously described (18). We  
122 used a stratified 3-fold cross validation approach, splitting our dataset into a validation set (1/3 of  
123 samples) and a training set (2/3 of samples) with the same infected:uninfected ratio. The model  
124 was first applied on all the features, then we used an embedded feature selection strategy to  
125 identify the most useful features in the model and improve its accuracy. Feature relative  
126 importance was computed using the mean decrease in impurity strategy, which calculates  
127 importance of each feature as the sum of the number of nodes (across all trees) that use the  
128 feature, proportional to the number of samples each of these nodes splits (18). Further details are  
129 described in the Supplemental Methods.

130

### 131 **Data availability.**

132       After removal of human reads (Supplementary Methods), the sequence data has been  
133 deposited in NCBI under BioProject PRJNA608678.

134

## 135 RESULTS

136

### 137 Metagenomic sequencing of the gut microbiome in household contacts exposed to *V.*

#### 138 *cholerae*

139 We performed metagenomic sequencing of the gut microbiome in 65 contacts of cholera  
140 cases from a cohort described by Midani *et al.* (15), from which sufficient DNA remained for  
141 shotgun metagenomic sequencing. Of these 65 contacts, referred to as the Midani 2018 cohort, 20  
142 developed infection during the follow-up period, and 45 remained uninfected (**Figure 1**). Among  
143 the 20 contacts who became infected, 10 had no symptoms during the follow-up period (30 days),  
144 and were classified as asymptomatic, and 10 developed symptoms (Supplementary Methods). To  
145 increase our sample size, we surveyed an expanded cohort (**Table S1**) by adding 33 samples to  
146 the Midani 2018 cohort, including 10 additional pre-infection samples from timepoints of  
147 contacts in the Midani 2018 cohort, and 23 samples from 16 newly enrolled contacts from the  
148 same population and the same time period (2012-2014, Dhaka, Bangladesh). We used pre-  
149 infection samples in order to identify factors predictive of disease outcomes and identify  
150 biomarkers in the microbiome of the Midani 2018 cohort, upon which we base the majority of  
151 our analyses. We also performed exploratory analyses on the expanded cohort to determine the  
152 potential for predictive models to be generalized to larger sample sizes.

153 We used the shotgun metagenomic DNA sequence reads from these samples to  
154 characterize four features of the microbiome: 1) relative abundances of microbial species, 2) the  
155 presence/absence of sub-species-level strains, 3) metabolic pathway relative abundances, and 4)  
156 gene family relative abundances (**Table 1**).

157

### 158 Predicting susceptibility to *V. cholerae* infection with Random Forest



159 We first used an RF model to predict *V. cholerae* susceptibility (developing infection or  
160 remaining uninfected) from baseline microbiome features (**Figure 1**). In the Midani 2018 cohort,  
161 functional pathways and gene families predicted infection significantly better than random (Two-  
162 sample *t*-tests comparing area under the curve [AUC] across 20 replicate 3 fold cross-validations;  
163  $p < 0.05$ ) compared to data with shuffled (randomized) labels, and also predicted infection better  
164 than species or strain features (**Table 1, Table S2**). Pathways and gene families had significantly  
165 higher mean AUCs (0.71 and 0.74, respectively) compared to species or strains (0.61 and 0.62) ( $p$   
166  $< 0.05$ ; **Table 1; Figure S1, Table S3**).

167 To determine the minimum number of metagenomic features required for accurate  
168 prediction, we repeated the analysis using smaller subsets of features. Using only 30 species, 60  
169 gene families or pathways, or 200 strains achieved similar cross-validation AUC values (**Figure**  
170 **S2**). We then trained an RF model on this reduced number of selected features, yielding improved  
171 predictions for all feature types (**Figure S1; Table S4**). This suggests that only a limited number  
172 of strains, species, genes and pathways in the gut microbiome at the time of exposure are  
173 sufficient to predict *V. cholerae* susceptibility. For example, prediction using strain level markers  
174 after feature selection yielded an AUC of 0.95 (**Table S4**). However, such high AUC values  
175 should be treated with caution because the models can be overfit when a supervised feature  
176 selection step is applied on the same data used to train the model (18). Because we did not have a  
177 fully independent validation cohort (*e.g.* from another continent) to test our model, we decided to  
178 use the features selected from the Midani cohort to make predictions on the Expanded dataset.  
179 Using the same features selected from the Midani 2018 training dataset, we made predictions on  
180 the Expanded cohort and achieved AUCs between 0.89 and 0.93 for prediction of infection using  
181 the four types of features (**Table S4**). Again, because the expanded cohort partly overlaps with  
182 the Midani cohort, and includes some repeated samples from the same individuals on different

183 study days, these results could also be prone to overfitting, but they demonstrate the potential for  
184 generalized predictions.

185 Finally, we repeated the RF analysis using all features in the expanded dataset and found  
186 that this increased predictive performance relative to the original Midani cohort (**Figure S1**).  
187 Once again, genes and pathways outperformed species and strains according to all metrics, with  
188 AUC reaching ~0.88 using cellular pathways (**Table 1**). This improvement in the expanded  
189 cohort also highlights the importance of using larger and more balanced datasets as input to  
190 predictive models.

191

## 192 **Improved prediction compared to known factors impacting susceptibility**

193 To put the metagenomic predictions in context, we next compared their predictive power  
194 and accuracy to clinical and demographic factors (**Table S1**). Three of these factors (age,  
195 baseline vibriocidal antibodies and blood group) are known to impact susceptibility to *V.*  
196 *cholerae* infection (6,15) (**Table S5**). The likelihood of developing infection was not predicted  
197 well using a RF model trained on the 7 features clinical and demographic factors (AUC=0.60, not  
198 significantly different from shuffled labels,  $p=0.66$ ; **Figure 2**). Predictions were not improved  
199 using all species-level metagenomic features present at the time of exposure to *V. cholerae*  
200 (AUC=0.61), but significantly improved using a selected number of species (AUC=0.80,  $p < 1$   
201  $\times 10^{-7}$ ). The use of all gene families or a selected number of genes showed an increased predictive  
202 performance (AUC=0.74 and AUC=0.89 respectively; **Figure 2**) compared to species-level or  
203 clinical and demographic contact data ( $p < 1 \times 10^{-7}$  for all comparisons). We again note the caveat  
204 that models with selected features may be overfit and represent an upper bound for predictive  
205 power. Even without feature selection, we found that gene families clearly provide superior  
206 predictions, and adding clinical data did not improve the predictions based on microbiome

207 features alone (**Figure 2**). Together, these results demonstrate that gene families present in the  
208 gut microbiome at the time of exposure contain more information about *V. cholerae* susceptibility  
209 compared to species-level or clinical and demographic contact data.

210

### 211 **Disease severity is more difficult to predict than likelihood of infection**

212 To predict symptomatic disease among infected individuals (**Figure 1**), we divided  
213 samples into uninfected, symptomatic and asymptomatic groups and again applied the RF  
214 approach. We used the F1 score as a performance metric since it is well suited for uneven class  
215 distributions in our uninfected/symptomatic/asymptomatic comparison. Applied to the Midani  
216 2018 cohort, this model predicted outcomes significantly better than random (shuffled labels)  
217 using species, strains or pathway data, but not gene families (**Table 1**; see **Table S3** for *p*-  
218 values). However, the F1 scores for the symptomatic/asymptomatic predictions were  
219 systematically lower (mean scores ranging from of 0.57 to 0.60) than for the infected/uninfected  
220 prediction (means ranging from 0.64 to 0.71). Using the expanded cohort, the scores were  
221 improved only slightly (**Table 1**). These results suggest that disease severity is predictable in  
222 principle, but with greater uncertainty than the simpler infection outcome.

223

### 224 **Taxonomic biomarkers of disease susceptibility and severity**

225 Predictive features in the gut microbiome identified to a species/strain or gene level allow  
226 the possibility of experimental follow-up to investigate mechanisms of the associations we  
227 observed. We characterized the most predictive species, pathways, and gene families (**Tables S6-**  
228 **S9**). The most common discriminating species in individuals that remained uninfected during the  
229 follow-up period were *Eubacterium rectale*, *Campylobacter hominis*, *Ruminococcus gnavus*,  
230 *Bacteroides vulgatus*, *Veillonella parvula* and members of the *Prevotella* and *Eubacterium*

231 genera (**Figure 3A, Figure S3A and Figure S4A**). Several species associated with contacts that  
232 developed *V. cholerae* infection belonged to the genera *Bifidobacterium*, *Actinomyces* or  
233 *Collinsella*, and many of the species were also associated with asymptomatic infection (**Figure**  
234 **3B, Figure S3B and Figure S4B**), including three species of *Bifidobacterium* (indicated with  
235 asterisks in **Figure 3**). The top predictive species in contacts who developed symptomatic  
236 infection were *Clostridium ventriculi* (formerly *Sarcina ventriculi*), *Streptococcus parasanguinis*  
237 and members of the *Veillonella* genera. *Shigella* species were also associated with the gut  
238 microbiome of persons who developed symptomatic *V. cholerae* infection, although persons  
239 enrolled in this study were *Shigella* stool-culture negative. The features identified by the  
240 multivariate RF model were confirmed using univariate statistics for the uninfected/infected  
241 prediction (**Figure S5**), but the overlap was poorer for the uninfected/symptomatic/asymptomatic  
242 prediction (**Figure S6**). This is consistent with the difficulty of correctly predicting disease  
243 severity.

244

#### 245 **Identification of functional biomarkers of disease susceptibility and severity**

246 We also identified gene families in the gut microbiome of persons who remained  
247 uninfected during follow-up (**Figures S7 and S8**), with some of the top gene families involved in  
248 DNA repair, transmembrane transporter activity, iron metabolism (indicated with asterisks in  
249 **Figure 4**), and genes of unknown function (**Table S8**). Long-chain fatty acid biosynthesis  
250 pathways (*e.g.* cis-vaccenate, gondoate and stearate) were more likely to be associated with  
251 individuals who remained uninfected, while amino acid biosynthesis pathways and catabolic  
252 pathways were associated with individuals who developed infection (**Figures S9 and S10, Table**  
253 **S9**). We identified three iron-related genes associated with individuals that remained uninfected:  
254 (1) the ferric uptake regulator Fur, a major regulator of iron homeostasis, (2) thioredoxin, a redox

255 protein involved in adaptation to oxidative and iron-deficiency stress, and (3) the  
256 TonB/ExbD/TolQR system, a ferric chelate transporter (19-21). In individuals who became  
257 infected and were asymptomatic, two genes involved in the conversion of riboflavin into  
258 catalytically active cofactors, the riboflavin kinase and the FAD synthetase, were found as the  
259 first and the third most discriminant features (**Figure 4, Table S8**).

260 We next asked which taxa in the microbiome likely encoded these genes. In some cases,  
261 specific taxonomic groups corresponded to discrete gene functions; for example, the *Prevotella*  
262 genus was the major contributor to several iron metabolism related gene families (**Figure S12**).  
263 In other cases, the major contributors to protective gene families were unclassified (**Figure 5 and**  
264 **Figure S11**). These results partly explain why gene families or pathway features tend to  
265 outperform species-level features in predicting infection status – because predictive gene families  
266 are distributed across many species, including several with poor taxonomic annotation or families  
267 lacking representation in taxonomic databases.

268

## 269 DISCUSSION

270 Cholera continues to cause widespread disease in populations without access to safe  
271 water. The gut microbiome is a potentially modifiable host risk factor for cholera, and  
272 identification of specific genes and strains correlated with susceptibility is needed for  
273 experimental testing to understand the mechanisms of observed correlations. Compared to a  
274 previous study using a single marker gene, shotgun metagenomics provides this degree of  
275 resolution, potentially to the species and strain level, and to the level of individual genes and  
276 cellular functions. We found that gene families in the gut microbiome at the time of exposure to  
277 *V. cholerae* were more predictive of susceptibility compared to taxonomic or clinical and  
278 demographic information.

279 Using a machine learning method to identify the most important factors contributing to  
280 our model, we selected 30 bacterial species from 65 samples to estimate which contacts became  
281 infected, and predicted outcomes with similar success rates as previously reported with 16S data  
282 (15). Prediction of infection was substantially improved by using gene families or metabolic  
283 pathways, highlighting the benefits of using richer metagenomic data. Selecting a subset of the  
284 most informative features further improved predictions, but using these selected features may  
285 lead to overfitting. This suggests an upper limit to predictive power that requires validation in  
286 larger, independent cohorts.

287 Most of the top predictive biomarkers (using both species and gene families) were  
288 associated with remaining uninfected after exposure to *V. cholerae*, and many of these  
289 biomarkers were consistently identified (**Figures 3 and 4**). An example is the genus *Prevotella*,  
290 including several strains within *Prevotella* sp. 885, identified only at the genus level in a previous  
291 study(15). *Prevotella* species are hypothesized to be beneficial members of the microbiota in

292 healthy individuals in non-Westernized countries, and this species is a potential candidate for  
293 follow up experimental studies in *V. cholerae* susceptibility (14,22,23).

294 Several species known to ferment mucin glycans into short chain fatty acids (SCFAs)  
295 correlated with remaining uninfected, including *Eubacterium rectale*, *Ruminococcus gnavus* and  
296 *Bacteroides vulgatus* (24,25). This finding is consistent with experiments of SCFAs applied to  
297 animal models. *B. vulgatus* has been shown to inhibit *V. cholerae* colonization in mice, an effect  
298 that was dependent upon SCFAs butyrate and propionate production (13). SCFAs are known to  
299 impact immune cell development and attenuate inflammation by inhibiting histone deacetylases  
300 and other mechanisms of altering gene expression (26-29).

301 All three *Bifidobacterium* species associated with contacts that developed infection were  
302 also associated with asymptomatic rather than symptomatic disease (**Figure 3**), and prior work on  
303 this genera supports several hypotheses for this relationship. First, *Bifidobacteria* are known to  
304 produce the SCFA acetate that can protect against enteric infection in mice (33,34)(30). SCFAs  
305 are also known to inhibit cholera toxin-related chloride secretion in the mouse gut, reducing  
306 water and sodium loss, and have also been observed to increase cholera toxin-specific antibody  
307 responses (31-33). *Bifidobacteria* are also major producers of lactate, a metabolite that has been  
308 shown to impair *V. cholerae* biofilm formation, a function that can impact pathogen virulence  
309 (12). Lastly, *B. bifidum* and *B. adolescentis* are known to reduce the activity of the *V. cholerae*  
310 type VI secretion system through modification of bile acids (9).

311 The use of metagenomics also allowed us to identify bacterial functions that could impact  
312 the ability of *V. cholerae* to compete and colonize the gut. For example, several gene families  
313 involved in iron transport, iron regulation, and riboflavin conversion appeared among the top  
314 twenty features associated with uninfected and asymptomatic individuals, suggesting that  
315 competition for iron might be a protective mechanism of the gut microbiota against *V. cholerae*,

316 as is the case for other pathogens (7). Iron is often a limiting redox cofactor in the gut, and  
317 bacteria have evolved strategies to solubilize and internalize iron (34,35). Riboflavin (another  
318 major redox cofactor in bacteria) and iron levels are reciprocally regulated in *V. cholerae*, and  
319 more generally, riboflavin may allow *V. cholerae* to overcome iron limitation in the gut (34,36).  
320 A gut microbiota more competitive for iron could be an important factor in resistance to *V.*  
321 *cholerae* colonization or virulence. Further work is thus needed to understand mechanisms of  
322 how the enrichment of these microbiome genes may protect people after exposure to *V. cholerae*.

323 Our results are currently not generalizable beyond the study cohort in Dhaka, Bangladesh,  
324 since a similar cohort in another geographic location is not available. As with any association-  
325 based study (37), it is unknown if any of the metagenomic features that correlate with protection  
326 from *V. cholerae* infection are causal, and many may be markers of clinical or environmental  
327 factors that themselves impact susceptibility. Further experimental characterization of  
328 metagenomic features correlated with protection from infection or symptoms are needed to  
329 understand if factors we identified impact *V. cholerae* pathogenesis or host responses to infection.  
330 Ultimately, the strains and functionalities identified have the potential to inform microbiota-based  
331 therapeutics to ameliorate or prevent disease. Our results show the power of metagenomic data  
332 from the gut microbiome to predict health outcomes such as susceptibility to infection and  
333 disease severity.



334 **FUNDING INFORMATION**

335  
336 This study was supported by CIHR (Canadian Institutes of Health Research) and the Canada  
337 Research Chairs program (BJS), The icddr,b: Centre for Health and Population Research, the  
338 Alfred P. Sloan Fellowship (LAD), grants AI099243 (J.B.H and L.C.I), AI103055 (J.B.H and  
339 F.Q), AI106878 (E.T.R and F.Q.), AI058935 (E.T.R, S.B.C and F.Q.), T32A1070611976 and  
340 K08AI123494 (A.A.W.) from the National Institutes of Health, and the Robert Wood Johnson  
341 Foundation Harold Amos Medical Faculty Development Program (R.C.C.).

342

343 **ACKNOWLEDGEMENTS**

344 We thank Meti Debela for technical assistance. Finally, we are grateful to the people of Dhaka  
345 where our study was undertaken; to the field, laboratory and data management staff who provided  
346 tremendous effort to make the study successful; and to the people who provided valuable support  
347 in our study. The icddr,b gratefully acknowledges the Government of the People's Republic of  
348 Bangladesh; Global Affairs Canada (GAC); Swedish International Development Cooperation  
349 Agency (Sida) and the Department for International Development, (UKAid). We declare that we  
350 have no competing financial interest.

351

352 **ETHICAL STATEMENT**

353  
354 The Ethical and Research Review Committees of the icddr,b and the Institutional Review Board  
355 of MGH reviewed the study. All adult subjects provided informed consent and parents/guardians  
356 of children provided informed consent. Informed consent was written.

357

358 **CONFLICTS OF INTEREST**

359 The authors declare that there are no conflicts of interest.

360 **FIGURES AND TABLES**

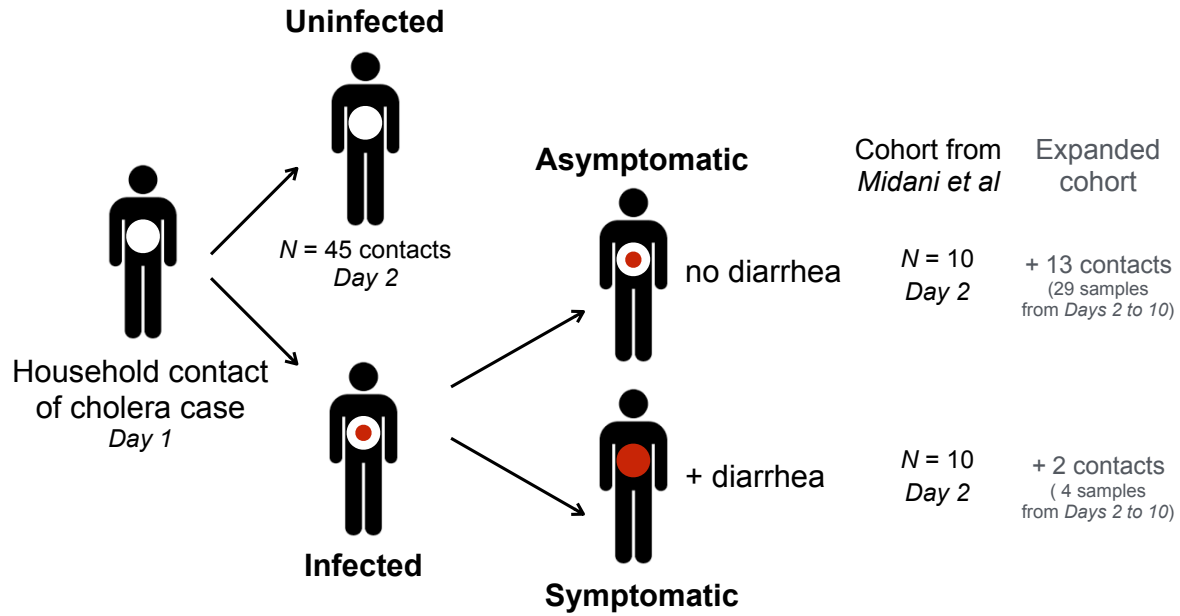

361  
362 **Figure 1. Study cohort in Dhaka, Bangladesh.** After presentation of a *V. cholerae* culture-  
363 positive index case to the hospital on day 1, household contacts were enrolled on day 2. The  
364 expanded cohort includes the Midani 2018 cohort (15), with an addition of 33 samples from  
365 infected individuals (13 asymptomatic and 2 symptomatic).

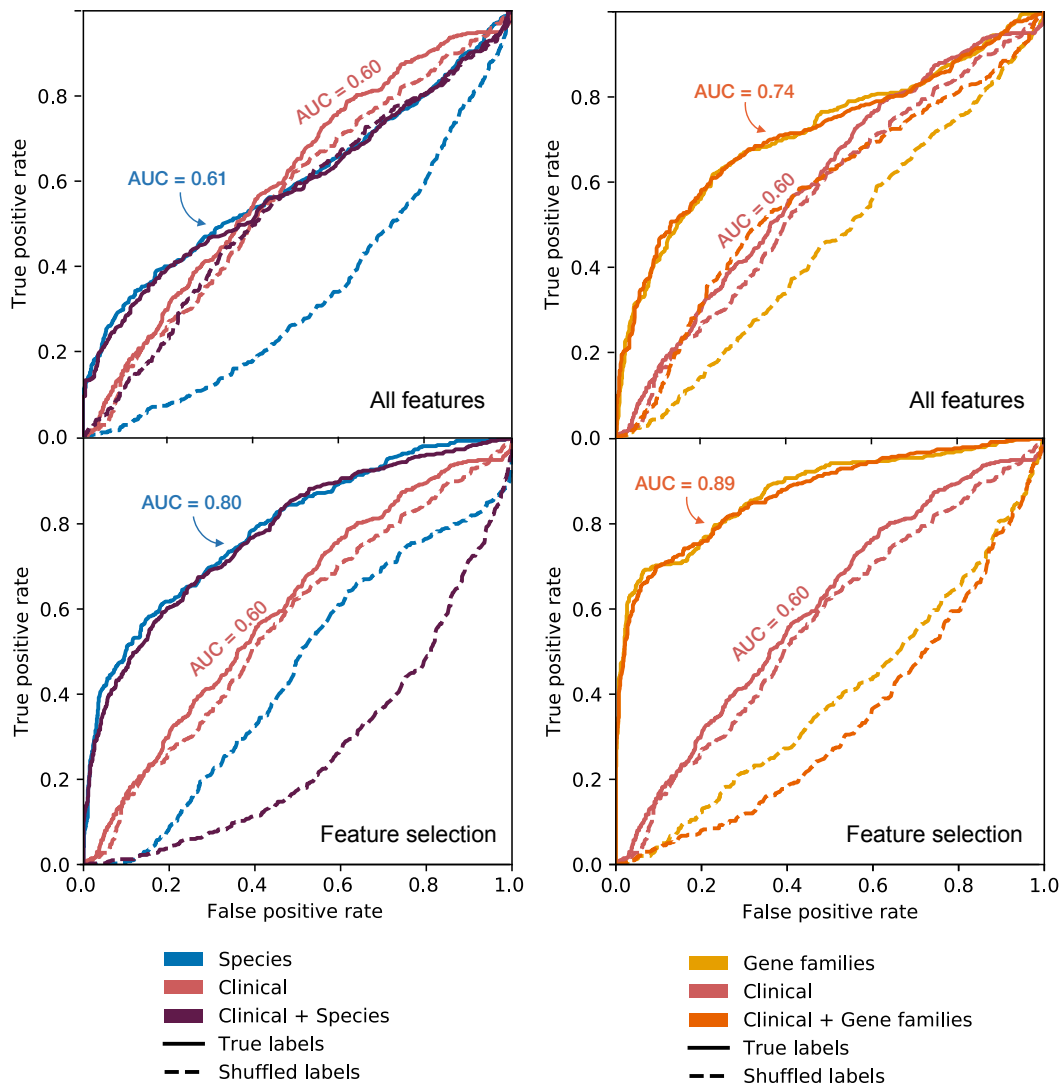

366 **Figure 2. Metagenomic features predict *V. cholerae* infection better than clinical and**  
367 **demographic features.** Random forest prediction of infection status was applied to 7 clinical and  
368 demographic features, and compared with all species and all gene families (top row), as well as  
369 30 selected species features from metagenomes and 60 selected gene family features (bottom  
370 row), or a combination of clinical, demographic and metagenomic features. Plots show receiver  
371 operating characteristic (ROC) curves (average across cross-validations) for the Midani 2018  
372 dataset. Shuffled labels represent the prediction run on a dataset with a random assignment of  
373 infection outcomes. AUC = area under the curve.

A

Top discriminating species associated with contacts who remained **uninfected** or became **infected**

*Mitsuokella multacida*  
*Catenibacterium* sp CAG 290  
*Burkholderia pyrrocinia*  
*Eubacterium rectale*  
*Prevotella* sp 885  
*Bifidobacterium longum*  
*Prevotella* sp TF12 30  
*Roseburia* sp CAG 471  
*Bifidobacterium adolescentis*  
*Faecalibacterium prausnitzii*  
*Prevotella* sp CAG 5226  
*Campylobacter hominis*  
*Slackia isoflavoniconvertens*  
*Bifidobacterium bifidum*  
*Firmicutes bacterium* CAG 83  
*Dialister* sp CAG 486  
*Eubacterium* sp CAG 202  
*Actinomyces odontolyticus*  
*Clostridiales bacterium* KLE1615  
*Ruminococcus gnavus*  
*Prevotella copri*  
*Shigella flexneri*  
*Veillonella parvula*  
*Burkholderia stabilis*  
*Bacteroides vulgatus*

B

Top discriminating species associated with contacts who remained **uninfected** or became **infected symptomatic** or **infected asymptomatic**

*Collinsella massiliensis*  
*Prevotella* sp 885  
*Burkholderia pyrrocinia*  
*Enorma massiliensis*  
*Catenibacterium* sp CAG 290  
*Veillonella parvula*  
*Eubacterium rectale*  
*Collinsella aerofaciens*  
*Clostridium ventriculi*  
*Escherichia coli*  
*Gemmiger formicilis*  
*Bifidobacterium bifidum*\*  
*Roseburia faecis*  
*Bifidobacterium adolescentis*\*  
*Shigella sonnei*  
*Faecalibacterium prausnitzii*  
*Shigella boydii*  
*Streptococcus parasanguinis*  
*Bifidobacterium longum*\*  
*Eubacterium* sp CAG 146  
*Prevotella* sp AM42 24  
*Roseburia* sp CAG 471  
*Veillonella atypica*  
*Veillonella infantium*  
*Prevotella* sp TF12 30

Feature importance ranking

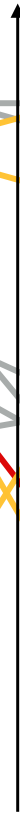

374

375 **Figure 3. Most important discriminating species of the gut microbiome at the time of**  
 376 **exposure to *V. cholerae* identified in the Midani 2018 dataset, classified by clinical outcome.**

377 (A) Species associated with contacts that became infected (red) or remained uninfected (yellow)  
 378 during follow-up. (B) Species associated with contacts who remained uninfected (yellow), or  
 379 became infected asymptomatic (green), or symptomatic (red) during follow-up. The top 25 most  
 380 important features are shown here; see Table S6 for the full list. Yellow lines connect species  
 381 associated with uninfected individuals in both (A) and (B); red lines connect species associated  
 382 with infection in (A) and symptomatic disease in (B); grey lines connect species associated with  
 383 infection in (A) but asymptomatic infection in (B). Three species of *Bifidobacterium* are marked  
 384 with an asterisk.

385

386

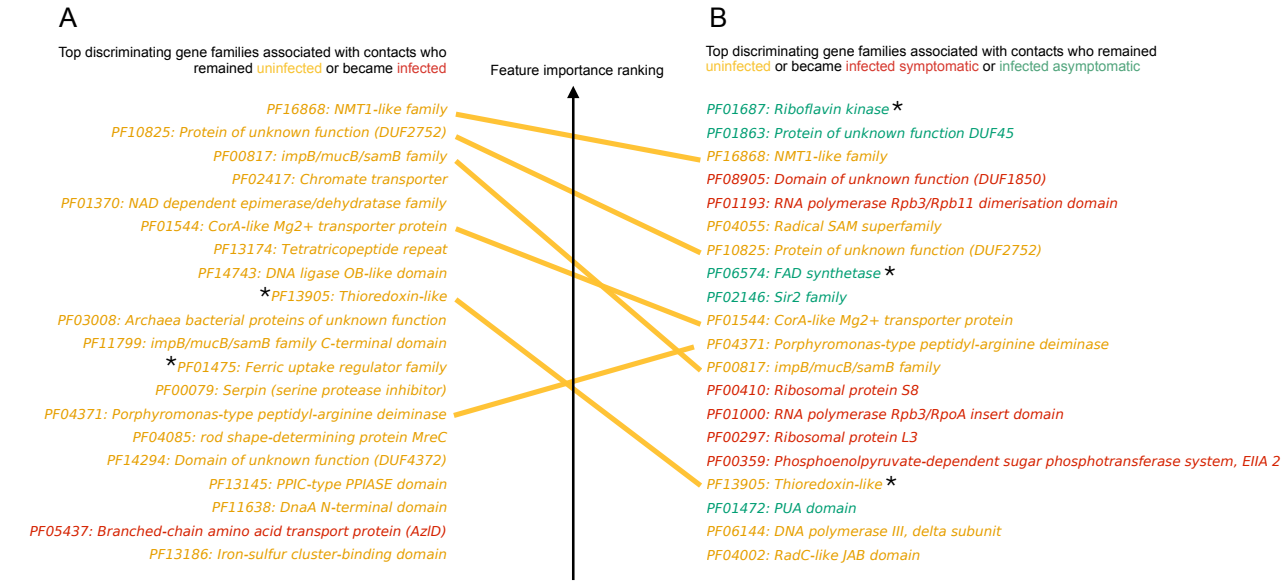

388 **Figure 4. Most important discriminating gene families of the gut microbiome at the time of**  
 389 **exposure to *V. cholerae* identified in the Midani 2018 dataset, classified by clinical outcome.**

390 (A) Genes families associated with contacts that became infected (red) or remained uninfected  
 391 (yellow) during follow-up. (B) Genes families associated with contacts who remained uninfected  
 392 (yellow), or became infected asymptomatic (green), or symptomatic (red) during follow-up. The  
 393 top 25 most important features are shown here; see Table S8 for the full list. Yellow lines connect  
 394 species associated with uninfected individuals in both (A) and (B). Asterisks indicate genes  
 395 involved in redox or iron metabolism.

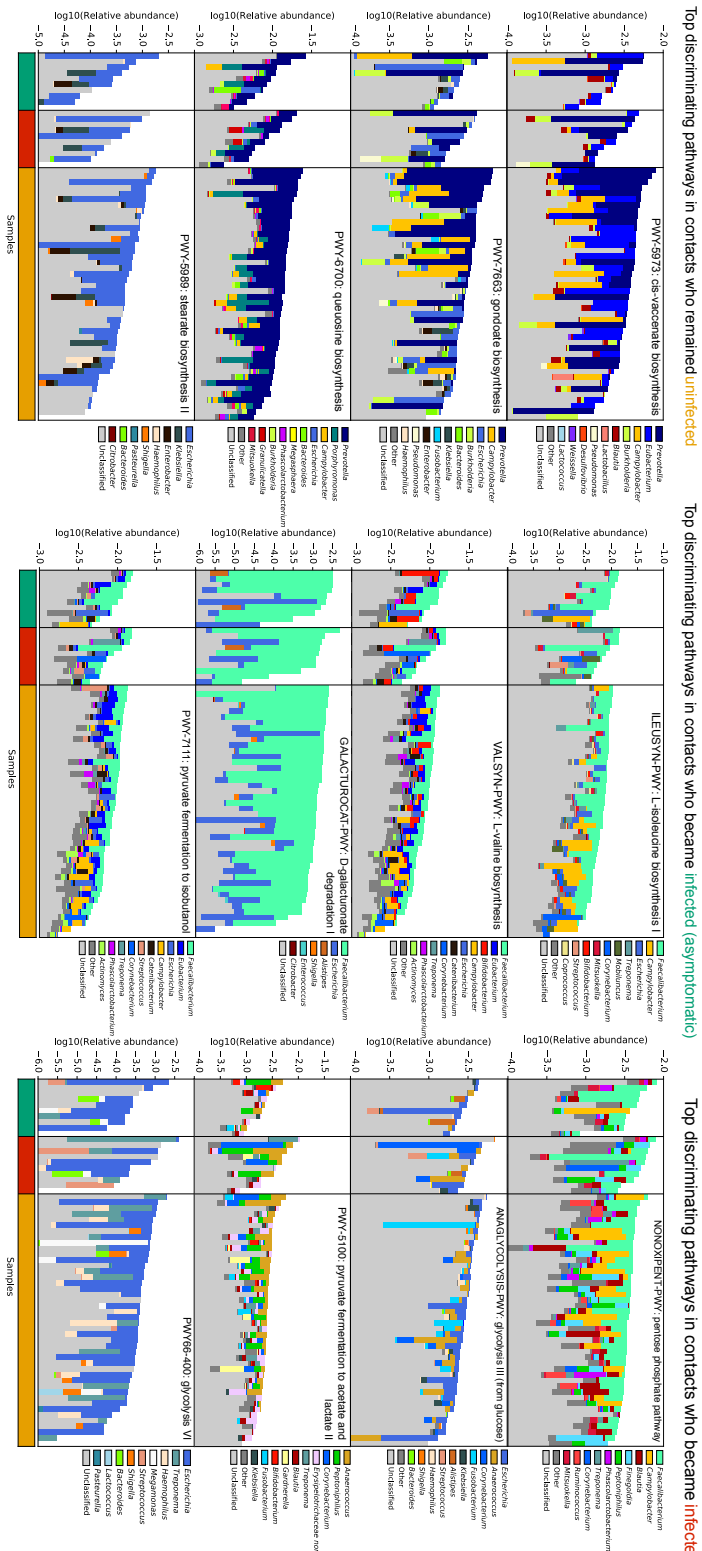

Top discriminating pathways in contacts who remained uninfected

Top discriminating pathways in contacts who became infected (asymptomatic)

Top discriminating pathways in contacts who became infected (symptomatic)

- 396 **Figure 5. Top predictive cellular pathways of the gut microbiome at the time of exposure to *V. cholerae* in the Midani 2018**
- 397 **cohort, annotated by their taxonomic contributors.** The four top-ranked pathways associated with uninfected contacts (left column),
- 398 contacts who developed asymptomatic infection (middle), and contacts who developed symptomatic infection (right column) are
- 399 shown. Total bar height reflects  $\log_{10}$ -scaled community relative abundance of each pathway. The contributions of each genus to
- 400 encoding these pathways are shown as stacked colors within each bar, linearly scaled within the total. See Table S9 for the complete
- 401 list of pathways.

402 **Tables**  
403

|                                           |           | RF – Cohort from Midani et al |                 |                 |                 | RF – Expanded     |                 |                 |                 |
|-------------------------------------------|-----------|-------------------------------|-----------------|-----------------|-----------------|-------------------|-----------------|-----------------|-----------------|
|                                           |           | Species abundance             | Strain markers  | Gene families   | Pathways        | Species abundance | Strain markers  | Gene families   | Pathways        |
|                                           | #features | 705                           | 54953           | 6810            | 443             | 807               | 62965           | 7514            | 461             |
| Infected Vs Uninfected                    | Accuracy  | 0.73<br>(±0.02)               | 0.71<br>(±0.02) | 0.76<br>(±0.02) | 0.72<br>(±0.02) | 0.76<br>(±0.03)   | 0.69<br>(±0.03) | 0.80<br>(±0.02) | 0.80<br>(±0.03) |
|                                           | Precision | 0.71<br>(±0.06)               | 0.68<br>(±0.06) | 0.77<br>(±0.04) | 0.70<br>(±0.05) | 0.76<br>(±0.03)   | 0.70<br>(±0.03) | 0.81<br>(±0.02) | 0.81<br>(±0.03) |
|                                           | F1        | 0.66<br>(±0.02)               | 0.64<br>(±0.03) | 0.71<br>(±0.03) | 0.66<br>(±0.03) | 0.75<br>(±0.03)   | 0.68<br>(±0.03) | 0.80<br>(±0.02) | 0.80<br>(±0.03) |
|                                           | AUC       | 0.61<br>(±0.05)               | 0.62<br>(±0.04) | 0.74<br>(±0.04) | 0.71<br>(±0.04) | 0.83<br>(±0.02)   | 0.76<br>(±0.03) | 0.87<br>(±0.02) | 0.88<br>(±0.02) |
| Shuffled                                  | F1        | 0.55<br>(±0.04)               | 0.56<br>(±0.04) | 0.56<br>(±0.04) | 0.56<br>(±0.05) | 0.40<br>(±0.03)   | 0.45<br>(±0.03) | 0.48<br>(±0.03) | 0.44<br>(±0.03) |
|                                           | AUC       | 0.40<br>(±0.04)               | 0.57<br>(±0.04) | 0.50<br>(±0.05) | 0.50<br>(±0.04) | 0.39<br>(±0.03)   | 0.52<br>(±0.03) | 0.51<br>(±0.03) | 0.46<br>(±0.03) |
| Asymptomatic vs Symptomatic vs Uninfected | Accuracy  | 0.70<br>(±0.02)               | 0.70<br>(±0.02) | 0.69<br>(±0.01) | 0.69<br>(±0.01) | 0.68<br>(±0.01)   | 0.60<br>(±0.03) | 0.69<br>(±0.02) | 0.67<br>(±0.03) |
|                                           | Precision | 0.53<br>(±0.03)               | 0.53<br>(±0.03) | 0.60<br>(±0.02) | 0.59<br>(±0.02) | 0.60<br>(±0.02)   | 0.53<br>(±0.03) | 0.61<br>(±0.02) | 0.59<br>(±0.02) |
|                                           | F1        | 0.60<br>(±0.02)               | 0.59<br>(±0.02) | 0.57<br>(±0.02) | 0.57<br>(±0.02) | 0.62<br>(±0.02)   | 0.55<br>(±0.03) | 0.64<br>(±0.02) | 0.62<br>(±0.02) |
|                                           | AUC       | NA                            | NA              | NA              | NA              | NA                | NA              | NA              | NA              |
| Shuffled                                  | F1        | 0.48<br>(±0.04)               | 0.49<br>(±0.04) | 0.46<br>(±0.03) | 0.55<br>(±0.03) | 0.41<br>(±0.03)   | 0.35<br>(±0.03) | 0.44<br>(±0.04) | 0.37<br>(±0.03) |
|                                           | AUC       | NA                            | NA              | NA              | NA              | NA                | NA              | NA              | NA              |

404

405 **Table 1. Assessment of prediction performance for a random forest (RF) model applied to**  
406 **the Midani 2018 and expanded cohorts.** Species abundances, strain-specific markers  
407 presence/absence, relative abundance of Pfam-grouped gene families, and MetaCyc pathways  
408 were used as features. For each dataset, we applied a binary (uninfected vs. infected contacts) and  
409 a multi-class (asymptomatic vs. symptomatic vs. uninfected contacts) classifier and reported  
410 performance metrics for each dataset. Metrics obtained by the same classifier applied to the same  
411 datasets with shuffled class labels (random assignment of labels to samples) are also reported  
412 (shuffled). The margins of errors (95% confidence intervals) are reported in parenthesis.

413 **REFERENCES**

- 414
- 415 1. Ali M, Nelson AR, Lopez AL, Sack DA. Updated Global Burden of Cholera in Endemic  
416 Countries. PLoS Negl Trop Dis. **2015**; 9(6):e0003832.
- 417 2. Camacho A, Bouhenia M, Alyusfi R, et al. Cholera epidemic in Yemen, 2016-18: an  
418 analysis of surveillance data. Lancet Glob Health. **2018**; 6(6):e680–e690.
- 419 3. Domman D, Chowdhury F, Khan AI, et al. Defining endemic cholera at three levels of  
420 spatiotemporal resolution within Bangladesh. Nat Genet. **2018**; :1–10.
- 421 4. Weil AA, Khan AI, Chowdhury F, et al. Clinical Outcomes in Household Contacts of  
422 Patients with Cholera in Bangladesh. Clin Infect Dis. **2009**; 49(10):1473–1479.
- 423 5. Nelson EJ, Harris JB, Morris JG, Calderwood SB, Camilli A. Cholera transmission: the  
424 host, pathogen and bacteriophage dynamic. Nature. **2009**; :1–10.
- 425 6. Harris JB, LaRocque RC, Chowdhury F, et al. Susceptibility to *Vibrio cholerae* Infection  
426 in a Cohort of Household Contacts of Patients with Cholera in Bangladesh. PLoS Negl  
427 Trop Dis. **2008**; 2(4):e221–8.
- 428 7. Ubeda C, Djukovic A, Isaac S. Roles of the intestinal microbiota in pathogen protection.  
429 Clinical & Translational Immunology. **2017**; 6(2).
- 430 8. Hsiao A, Ahmed AMS, Subramanian S, et al. Members of the human gut microbiota  
431 involved in recovery from *Vibrio cholerae* infection. Nature. **2014**; 515(7527):423–426.
- 432 9. Bachmann V, Kostiuk B, Unterweger D, Diaz-Satizabal L, Ogg S, Pukatzki S. Bile Salts  
433 Modulate the Mucin-Activated Type VI Secretion System of Pandemic *Vibrio cholerae*.  
434 PLoS Negl Trop Dis. **2015**; 9(8):e0004031.
- 435 10. Yoon MY, Min KB, Lee K-M, et al. A single gene of a commensal microbe affects host  
436 susceptibility to enteric infection. Nature Communications. **2016**; 7:1–11.
- 437 11. Mao N, Cubillos-Ruiz A, Cameron DE, Collins JJ. Probiotic strains detect and suppress  
438 cholera in mice. Science Translational Medicine. **2018**; 10(445).
- 439 12. Kaur S, Sharma P, Kalia N, Singh J, Kaur S. Anti-biofilm Properties of the Fecal Probiotic  
440 Lactobacilli Against *Vibrio* spp. Front Cell Infect Microbiol. **2018**; 8.
- 441 13. You JS, Yong JH, Kim GH, et al. Commensal-derived metabolites govern *Vibrio cholerae*  
442 pathogenesis in host intestine. Microbiome. **2019**; 7(1):1–18.
- 443 14. David LA, Weil A, Ryan ET, et al. Gut Microbial Succession Follows Acute Secretory  
444 Diarrhea in Humans. mBio **2015**; 6(3):e00381–15.
- 445 15. Midani FS, Weil AA, Chowdhury F, et al. Human Gut Microbiota Predicts Susceptibility  
446 to *Vibrio cholerae* Infection. J Infect Dis. **2018**; 218(4):645–653.



- 447 16. Truong DT, Franzosa EA, Tickle TL, et al. MetaPhlAn2 for enhanced metagenomic  
448 taxonomic profiling. *Nature Methods*. **2015**; 12(10):902–903.
- 449 17. Franzosa EA, McIver LJ, Rahnavard G, et al. Species-level functional profiling of  
450 metagenomes and metatranscriptomes. *Nature Methods*. **2018**; 15(11):962–968.
- 451 18. Pasolli E, Truong DT, Malik F, Waldron L, Segata N. Machine Learning Meta-analysis of  
452 Large Metagenomic Datasets: Tools and Biological Insights. *PLoS Comput Biol*. **2016**;  
453 12(7):e1004977.
- 454 19. Fillat MF. The FUR (ferric uptake regulator) superfamily: diversity and versatility of key  
455 transcriptional regulators. *Arch Biochem Biophys*. **2014**; 546:41–52.
- 456 20. Wang B-Y, Huang H-Q, Li S, et al. Thioredoxin H (TrxH) contributes to adversity  
457 adaptation and pathogenicity of *Edwardsiella piscicida*. *Vet Res*. **2019**; 50(1):1–13.
- 458 21. Noinaj N, Guillier M, Barnard TJ, Buchanan SK. TonB-dependent transporters: regulation,  
459 structure, and function. *Annu Rev Microbiol*. **2010**; 64:43–60.
- 460 22. Tett A, Huang KD, Asnicar F, et al. The *Prevotella copri* Complex Comprises Four  
461 Distinct Clades Underrepresented in Westernized Populations. *Cell Host and Microbe*.  
462 **2019**; 26(5):666–679.e7.
- 463 23. Kovatcheva-Datchary P, Nilsson A, Akrami R, et al. Dietary Fiber-Induced Improvement  
464 in Glucose Metabolism Is Associated with Increased Abundance of *Prevotella*. *Cell Metab*.  
465 **2015**; 22(6):971–982.
- 466 24. Crost EH, Tailford LE, Le Gall G, Fons M, Henrissat B, Juge N. Utilisation of mucin  
467 glycans by the human gut symbiont *Ruminococcus gnavus* is strain-dependent. *PLoS ONE*.  
468 **2013**; 8(10):e76341.
- 469 25. Tailford LE, Crost EH, Kavanaugh D, Juge N. Mucin glycan foraging in the human gut  
470 microbiome. *Front Genet*. **2015**; 6.
- 471 26. Sun Y, O’Riordan MXD. Regulation of bacterial pathogenesis by intestinal short-chain  
472 Fatty acids. *Adv Appl Microbiol*. **2013**; 85:93–118.
- 473 27. Koh A, De Vadder F, Kovatcheva-Datchary P, Bäckhed F. From Dietary Fiber to Host  
474 Physiology: Short-Chain Fatty Acids as Key Bacterial Metabolites. *Cell*. **2016**;  
475 165(6):1332–1345.
- 476 28. Louis P, Flint HJ. Formation of propionate and butyrate by the human colonic microbiota.  
477 *Environmental Microbiology*. **2017**; 19(1):29–41.
- 478 29. Fachi JL, Souza Felipe J de, Pral LP, et al. Butyrate Protects Mice from *Clostridium*  
479 *difficile*-Induced Colitis through an HIF-1-Dependent Mechanism. *Cell Reports*. **2019**. p.  
480 750–761.e7.

- 481 30. Fukuda S, Toh H, Hase K, et al. Bifidobacteria can protect from enteropathogenic  
482 infection through production of acetate. *Nature*. **2011**; 469(7331):543–547.
- 483 31. Canani RB, Costanzo MD, Leone L, Pedata M, Meli R, Calignano A. Potential beneficial  
484 effects of butyrate in intestinal and extraintestinal diseases. *World J Gastroenterol*. **2011**;  
485 17(12):1519–1528.
- 486 32. Yang W, Xiao Y, Huang X, et al. Microbiota Metabolite Short-Chain Fatty Acids  
487 Facilitate Mucosal Adjuvant Activity of Cholera Toxin through GPR43. *The Journal of*  
488 *Immunology*. **2019**; 203(1):282–292.
- 489 33. Rabbani GH, Albert MJ, Rahman H, Chowdhury AK. Short-Chain Fatty Acids Inhibit  
490 Fluid and Electrolyte Loss Induced by Cholera Toxin in Proximal Colon of Rabbit In  
491 Vivo. *Dig Dis Sci*. **1999** 44(8):1547–1553.
- 492 34. Sepúlveda Cisternas I, Salazar JC, García-Angulo VA. Overview on the Bacterial Iron-  
493 Riboflavin Metabolic Axis. *Front Microbiol*. **2018**; 9:1478.
- 494 35. Rivera-Chávez F, Mekalanos JJ. Cholera toxin promotes pathogen acquisition of host-  
495 derived nutrients. *Nature*. **2019**; 572(7768):244–248.
- 496 36. Sepúlveda Cisternas I, Aguirre LL, Flores AF, de Ovando IVS, García-Angulo VA.  
497 Transcriptomics reveals a cross-modulatory effect between riboflavin and iron and outlines  
498 responses to riboflavin biosynthesis and uptake in *Vibrio cholerae*. *Scientific Reports*.  
499 **2018**; 8(1):1–14.
- 500 37. Schmidt TSB, Raes J, Bork P. The Human Gut Microbiome: From Association to  
501 Modulation. *Cell*. **2018**; 172(6):1198–1215.

502
